# Supplementary material for: Phenylalanine Residues in the Active Site of CYP2E1 Participate in Determining the Binding Orientation and Metabolism-Dependent Genotoxicity of Aromatic Compounds
Source: MDPI journal article supplement (doi:10.3390/toxics11060495), 2023-05-31
Supplement: s1 [file s1]

## Supplemental materials

# Phenylalanine residues in the active site of CYP2E1 participate in determining the binding orientation and metabolism-dependent genotoxicity of aromatic compounds

Keqi Hu<sup>1,2,#</sup>, Hongwei Tu<sup>3,#</sup>, Jiayi Xie<sup>2,#</sup>, Zongying Yang<sup>2</sup>, Huanzi Li<sup>1</sup>, Yijing Chen<sup>2</sup>, Yungang Liu<sup>2,\*</sup>

<sup>1</sup> Department of Science and Education, Guangdong Second Provincial General Hospital, 466 Xingang Middle Road, Guangzhou 510317, China.

<sup>2</sup> Department of Toxicology, School of Public Health, Southern Medical University (Guangdong Provincial Key Laboratory of Tropical Disease Research), 1023 S. Shatai Road, Guangzhou 510515, China.

<sup>3</sup> Guangdong Provincial Center for Disease Control and Prevention, Qunxian Road, Panyu District, Guangzhou 511430, China.

# These authors contributed equally to this work.

\* Correspondence: Yungang Liu, yungliu@126.com

Numbers of Tables: 4

Numbers of Figures: 1

**Table S1.** Molecular docking of 1-MP to human CYP2E1 under rigid and flexible settings with regard to the cavity volume, binding energy, and ligand-heme distance

| PDB ID | Resolution | Rigid docking            |                                 |                | PHEs flexible docking    |                                 |                |
|--------|------------|--------------------------|---------------------------------|----------------|--------------------------|---------------------------------|----------------|
|        |            | Volume (Å <sup>3</sup> ) | Binding energy score (kcal/mol) | Cα to Heme (Å) | Volume (Å <sup>3</sup> ) | Binding energy score (kcal/mol) | Cα to Heme (Å) |
| 3LC4   | 3.10       | 101.93                   | −8.24                           | 4.4            | 101.59                   | −10.99                          | 3.8            |
| 3KOH   | 2.90       | 110.40                   | −9.57                           | 3.8            | 111.90                   | −10.71                          | 4.0            |
| 3GPH   | 2.70       | 94.83                    | −9.30                           | 3.2            | 82.77                    | −10.92                          | 4.2            |
| 3E4E   | 2.60       | 69.22                    | −7.56                           | Outside*       | 78.35                    | −10.73                          | 3.8            |
| 3T3Z   | 2.35       | 111.83                   | −8.82                           | 10.4           | 95.69                    | −10.16                          | 5.3            |
| 3E6I   | 2.20       | 83.38                    | −7.73                           | Outside*       | 86.01                    | −10.89                          | 3.0            |
| F298A  | -          | -                        | -                               | -              | -                        | −10.62                          | 4.7            |
| F478A  | -          | -                        | -                               | -              | -                        | −9.55                           | 3.3            |

\* Compound was bound to the enzyme at some position outside of the active site.

**Table S2.** Features of high rank tunnels for the binding of 1-MP to the active center of human CYP2E1

| Compounds | Tunnels | Occurrence, % | Average bottleneck radius, Å | Maximum bottleneck radius, Å | Average tunnel length, Å |
|-----------|---------|---------------|------------------------------|------------------------------|--------------------------|
| 1-MP      | 2c      | 97.6          | 1.31 ± 0.16                  | 1.71                         | 21.44 ± 1.73             |
|           | 2b      | 74.6          | 1.22 ± 0.16                  | 1.72                         | 30.12 ± 2.57             |

**Table S3.** The energy decomposition of non-PHE amino acid residues in the active sites of 1-MP-bound wild-type and mutated human CYP2E1

| Residues | CYP2E1-WT<br>kJ/mol | CYP2E1-F298A<br>kJ/mol | CYP2E1-F478A<br>kJ/mol | Energy<br>Change |
|----------|---------------------|------------------------|------------------------|------------------|
| ILE115   | $-3.18 \pm 1.31$    | $-4.26 \pm 0.71$       | $-5.36 \pm 0.89$       | ↓                |
| ASN206   | $-0.33 \pm 0.10$    | $-6.52 \pm 0.98$       | $-1.44 \pm 0.32$       | ↓                |
| LEU210   | $-0.37 \pm 0.16$    | $0.16 \pm 1.11$        | $-2.01 \pm 0.66$       | ↓                |
| ALA299   | $-4.16 \pm 0.86$    | $-3.17 \pm 1.29$       | $-2.69 \pm 1.27$       | ↑                |
| GLU302   | $-2.62 \pm 1.30$    | $-3.23 \pm 1.21$       | $-0.94 \pm 0.35$       | ↑                |
| THR303   | $-4.94 \pm 1.12$    | $-0.33 \pm 0.09$       | $-1.74 \pm 1.72$       | ↑                |
| LEU363   | $-2.47 \pm 1.04$    | $-0.95 \pm 0.20$       | $-1.22 \pm 0.64$       | ↑                |
| VAL364   | $-2.85 \pm 1.70$    | $-3.47 \pm 0.70$       | $-3.19 \pm 0.91$       | ↓                |
| LEU368   | $-2.68 \pm 0.58$    | $1.25 \pm 1.08$        | $-6.20 \pm 1.06$       | ↓                |

**Table S4.** The molecular descriptors of PCB congeners as candidate factors influencing their binding to human CYP2E1 and orientation

| PCB | MutaG<br>(1-4) | CN | OP | MP | PP | DBES  | DtF  | L_HLG | L_EP | L_NP | P_HLG | P_EP | P_NP | FODw  | FODm  | FODp  | MW     | AHR  | Kow  | HLF   |
|-----|----------------|----|----|----|----|-------|------|-------|------|------|-------|------|------|-------|-------|-------|--------|------|------|-------|
| 1   | 0              | 1  | 1  | 0  | 0  | -7.00 | 3.2  | 7.67  | 1.18 | 1.66 | 7.36  | 1.22 | 1.86 | 0.102 | 0.106 | 0.098 | 188.65 | 28.5 | 4.47 | 7.1   |
| 2   | 0              | 1  | 0  | 1  | 0  | -7.23 | 3.9  | 7.17  | 1.32 | 1.86 | 6.92  | 1.37 | 2.00 | 0.146 | 0.163 | 0.102 | 188.65 | 52.3 | 4.64 | 20.2  |
| 3   | 0              | 1  | 0  | 0  | 1  | -5.40 | 10.0 | 7.06  | 1.29 | 1.99 | 7.00  | 1.27 | 2.08 | 0.108 | 0.114 | 0.127 | 188.65 | 38.5 | 4.61 | 35.3  |
| 4   | 1              | 2  | 2  | 0  | 0  | -7.56 | 3.2  | 7.82  | 1.23 | 1.45 | 7.49  | 1.27 | 1.69 | 0.224 | 0.103 | 0.108 | 223.10 | 20.1 | 4.95 | 185.5 |
| 5   | 1              | 2  | 1  | 1  | 0  | -7.71 | 3.9  | 7.74  | 1.31 | 1.49 | 7.28  | 1.32 | 1.77 | 0.165 | 0.144 | 0.120 | 223.10 | 29.3 | 5.02 | 141.4 |
| 6   | 1              | 2  | 1  | 1  | 0  | -7.83 | 3.8  | 7.21  | 1.40 | 1.70 | 7.34  | 1.33 | 1.71 | 0.164 | 0.176 | 0.107 | 223.10 | 30.1 | 5.02 | 185.3 |
| 7   | 0              | 2  | 1  | 0  | 1  | -7.32 | 3.9  | 7.41  | 1.29 | 1.69 | 7.24  | 1.31 | 1.80 | 0.231 | 0.168 | 0.112 | 223.10 | 26.3 | 5.13 | 42.4  |
| 8   | 1              | 2  | 1  | 0  | 1  | -7.19 | 3.9  | 7.42  | 1.28 | 1.71 | 7.20  | 1.31 | 1.84 | 0.149 | 0.212 | 0.098 | 223.10 | 28.4 | 5.09 | 42.8  |
| 9   | 0              | 2  | 1  | 1  | 0  | -7.85 | 3.7  | 7.41  | 1.33 | 1.65 | 7.17  | 1.32 | 1.87 | 0.136 | 0.160 | 0.121 | 223.10 | 30.6 | 5.13 | 239.1 |
| 10  | 1              | 2  | 2  | 0  | 0  | -7.37 | 4.1  | 8.14  | 1.06 | 1.25 | 7.47  | 1.24 | 1.73 | 0.155 | 0.102 | 0.122 | 223.10 | 28.7 | 4.99 | 185.6 |
| 11  | 1              | 2  | 0  | 2  | 0  | -7.49 | 4.6  | 7.03  | 1.47 | 1.76 | 6.99  | 1.45 | 1.83 | 0.164 | 0.172 | 0.104 | 223.10 | 40.5 | 5.28 | 28.5  |
| 12  | 1              | 2  | 0  | 1  | 1  | -7.39 | 4.0  | 6.94  | 1.41 | 1.90 | 6.85  | 1.40 | 2.01 | 0.130 | 0.133 | 0.141 | 223.10 | 31.0 | 5.29 | 48.8  |
| 13  | 0              | 2  | 0  | 1  | 1  | -5.83 | 10.0 | 6.74  | 1.49 | 1.97 | 6.89  | 1.42 | 1.95 | 0.162 | 0.160 | 0.133 | 223.10 | 30.3 | 5.16 | 63.5  |
| 14  | 0              | 2  | 0  | 2  | 0  | -5.97 | 10.0 | 6.78  | 1.61 | 1.84 | 7.02  | 1.46 | 1.80 | 0.126 | 0.137 | 0.127 | 223.10 | 41.3 | 5.41 | 12.9  |
| 15  | 0              | 2  | 0  | 0  | 2  | -7.33 | 8.5  | 6.74  | 1.42 | 2.06 | 6.80  | 1.36 | 2.10 | 0.168 | 0.134 | 0.139 | 223.10 | 20.2 | 5.26 | 12.5  |
| 18  | 1              | 3  | 2  | 1  | 0  | -8.32 | 3.7  | 7.68  | 1.30 | 1.45 | 7.52  | 1.27 | 1.64 | 0.170 | 0.188 | 0.131 | 257.54 | 11.2 | 5.52 | 74.3  |
| 19  | 1              | 3  | 3  | 0  | 0  | -7.65 | 3.0  | 8.04  | 1.18 | 1.29 | 7.48  | 1.18 | 1.81 | 0.118 | 0.130 | 0.114 | 257.54 | 11.2 | 5.48 | 315.2 |
| 20  | 1              | 3  | 1  | 2  | 0  | -8.09 | 4.5  | 7.32  | 1.47 | 1.55 | 7.26  | 1.40 | 1.66 | 0.188 | 0.187 | 0.118 | 257.54 | 11.2 | 5.57 | 122.0 |
| 22  | 1              | 3  | 1  | 1  | 1  | -7.85 | 4.5  | 7.28  | 1.39 | 1.65 | 7.16  | 1.36 | 1.81 | 0.179 | 0.168 | 0.115 | 257.54 | 11.3 | 5.44 | 144.2 |
| 27  | 1              | 3  | 2  | 1  | 0  | -7.87 | 4.5  | 8.03  | 1.17 | 1.28 | 7.41  | 1.31 | 1.68 | 0.179 | 0.175 | 0.114 | 257.54 | 11.2 | 5.64 | 97.7  |
| 28  | 1              | 3  | 1  | 0  | 2  | -7.76 | 5.8  | 7.14  | 1.39 | 1.75 | 7.02  | 1.39 | 1.86 | 0.148 | 0.145 | 0.127 | 257.54 | 11.0 | 5.62 | 75.9  |
| 32  | 1              | 3  | 2  | 0  | 1  | -7.26 | 3.7  | 7.98  | 1.18 | 1.33 | 7.41  | 1.32 | 1.65 | 0.165 | 0.153 | 0.116 | 257.54 | 1.12 | 5.75 | 274.2 |
| 40  | 0              | 4  | 2  | 2  | 0  | -8.56 | 4.5  | 7.91  | 1.34 | 1.20 | 7.45  | 1.29 | 1.66 | 0.159 | 0.155 | 0.133 | 291.98 | 7.68 | 6.04 | 102.6 |
| 46  | 0              | 4  | 3  | 1  | 0  | -8.35 | 4.4  | 7.96  | 1.31 | 1.21 | 7.44  | 1.29 | 1.76 | 0.147 | 0.182 | 0.132 | 291.98 | 7.64 | 6.18 | 153.5 |
| 52  | 1              | 4  | 2  | 2  | 0  | -6.37 | 10.0 | 7.56  | 1.42 | 1.39 | 7.44  | 1.36 | 1.59 | 0.207 | 0.190 | 0.162 | 291.98 | 7.92 | 6.18 | 262.4 |
| 54  | 0              | 4  | 4  | 0  | 0  | -5.60 | 10.0 | 8.06  | 1.24 | 1.22 | 7.54  | 1.20 | 1.67 | 0.171 | 0.148 | 0.134 | 291.98 | 7.44 | 5.94 | 153.3 |

|     |   |   |   |   |   |       |      |      |      |      |      |      |      |       |       |       |        |      |      |       |
|-----|---|---|---|---|---|-------|------|------|------|------|------|------|------|-------|-------|-------|--------|------|------|-------|
| 56  | 1 | 4 | 1 | 2 | 1 | -8.27 | 4.5  | 7.37 | 1.45 | 1.48 | 7.16 | 1.48 | 1.63 | 0.197 | 0.198 | 0.134 | 291.98 | 8.71 | 6.17 | 295.5 |
| 66  | 1 | 4 | 1 | 1 | 2 | -8.60 | 5.6  | 7.09 | 1.49 | 1.64 | 7.02 | 1.47 | 1.75 | 0.243 | 0.177 | 0.139 | 291.98 | 9.12 | 6.11 | 119.6 |
| 74  | 1 | 4 | 2 | 1 | 1 | -8.11 | 3.8  | 7.71 | 1.36 | 1.37 | 7.51 | 1.32 | 1.66 | 0.169 | 0.201 | 0.141 | 291.98 | 9.13 | 6.66 | 346.9 |
| 77  | 0 | 4 | 0 | 2 | 2 | -8.62 | 8.3  | 6.55 | 1.68 | 1.87 | 6.71 | 1.56 | 1.90 | 0.253 | 0.250 | 0.171 | 291.98 | 10.1 | 6.62 | 22.7  |
| 81  | 0 | 4 | 0 | 2 | 2 | -6.39 | 10.0 | 6.51 | 1.70 | 1.88 | 6.72 | 1.57 | 1.87 | 0.189 | 0.200 | 0.176 | 291.98 | 10.1 | 6.15 | 48.8  |
| 105 | 1 | 5 | 1 | 2 | 2 | -8.50 | 5.3  | 7.08 | 1.57 | 1.55 | 7.02 | 1.54 | 1.66 | 0.283 | 0.245 | 0.160 | 326.42 | 6.49 | 6.79 | 115.7 |
| 118 | 1 | 5 | 1 | 2 | 2 | -8.67 | 5.4  | 7.40 | 1.54 | 1.31 | 6.89 | 1.53 | 1.75 | 0.250 | 0.243 | 0.164 | 326.42 | 6.41 | 7.11 | 154.7 |
| 126 | 0 | 5 | 0 | 3 | 2 | -8.71 | 7.3  | 6.50 | 1.80 | 1.75 | 6.64 | 1.66 | 1.81 | 0.274 | 0.273 | 0.204 | 326.42 | 6.63 | 6.56 | 250.4 |

MutaG, human CYP2E1-activated mutagenicity of a PCB congener (1-4); CN, the number of Cl-substitutions; OP, the number of ortho-Cl-substitutions; MP, the number of meta-Cl-substitutions; PP, the number of para-Cl-substitutions; DBES, binding energy score obtained from molecular docking with PHE478 being set flexible; DtF, the distance from SOM to Fe ion in the heme; L\_HLG, the HOMO-LUMO gap of ligand; L\_EP, the electrophilicity of ligand; L\_NP, the nucleophilicity of ligand; P\_HLG, the HOMO-LUMO gap of ligand-PHE complex; P\_EP, the electrophilicity of ligand-PHE complex; P\_NP, the nucleophilicity of ligand-PHE complex; FODw, the FOD value of ligand bound to the active site of human CYP2E1; FODm, the FOD value of ligand bound to the active site of F478A mutant; FODp, the FOD value of ligand; Mass, the molecular weight; AHR, atmospheric hydroxylation rate (cm<sup>3</sup>/molecule\*sec); Kow, LogKow: Octanol-Water partition coefficient; HLF, the half-life (by biotransformation and elimination) in fish.

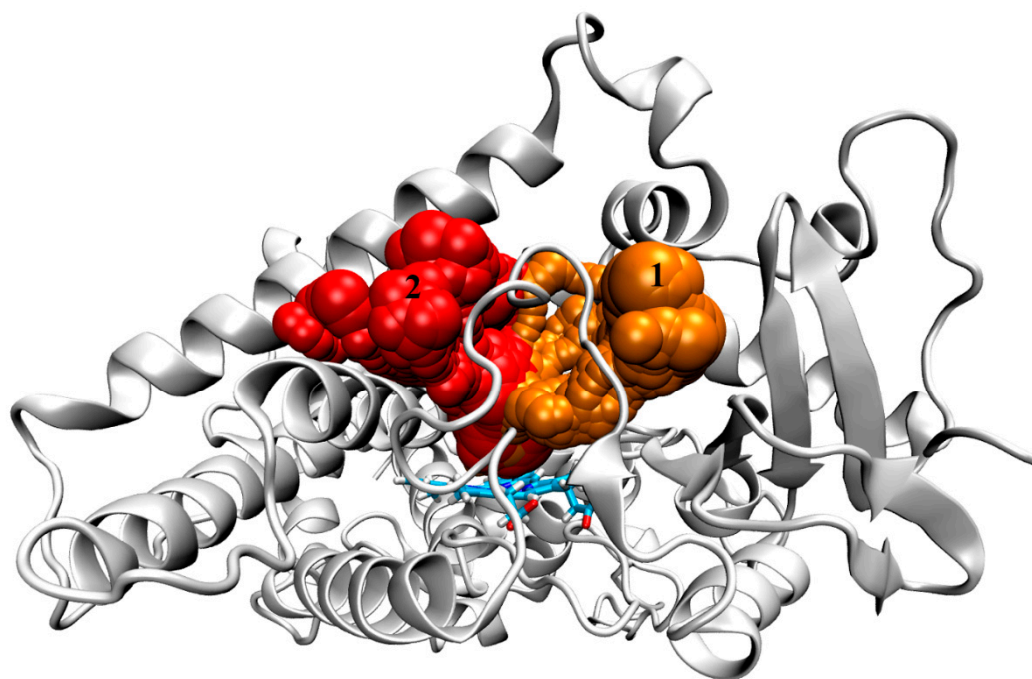

**Figure S1.** Two major tunnels for ligands entering the active site in human CYP2E1  
Tunnel 1 indicates the 2b tunnel, which is controlled by PHE478; Tunnel 2 indicates the 2c  
tunnel, as controlled by PHE298.

## References

1. Liu Y, Hu K, Jia H, Jin G, Glatt H, Jiang H. Potent mutagenicity of some non-planar tri- and tetrachlorinated biphenyls in mammalian cells, human CYP2E1 being a major activating enzyme. *Arch Toxicol.* 2017;91(7):2663-76.
2. Zhang C, Lai Y, Jin G, Glatt H, Wei Q, Liu Y. Human CYP2E1-dependent mutagenicity of mono- and dichlorobiphenyls in Chinese hamster (V79)-derived cells. *Chemosphere.* 2016;144:1908-15.
3. Chen Y, Zhu N, Luo Y, Hu K, Liu Y. Featured structure-activity relationships for some tri- and tetrachlorobiphenyls in human CYP2E1-activated mutagenicity - Impact of the extent of ortho-chlorination. *Chemosphere.* 2018;210:467-75.
4. Hu K, Yu H, Li Z, Jin G, Jia H, Song M, et al. Human CYP2E1-activated mutagenicity of dioxin-like PCBs 105 and 118-Experimental data consistent with molecular docking results. *Toxicology.* 2020;437:152438.
